# Supplementary material for: 30-year lidar observations of the stratospheric aerosol layer stateover Tomsk (Western Siberia, Russia)
Source: Copernicus journal article supplement (doi:10.5194/acp-2016-792), 2016-10-13
Supplement: Supplementary file [file acp-2016-792-RC2-supplement.pdf]

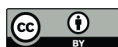

## 30-year lidar observations of the stratospheric aerosol layer state over Tomsk (Western Siberia, Russia)

Vladimir V. Zuev<sup>1,2,3</sup>, Vladimir D. Burlakov<sup>4</sup>, Aleksei V. Nevzorov<sup>4</sup>, Vladimir L. Pravdin<sup>1</sup>, Ekaterina S. Savelieva<sup>1</sup>, and Vladislav V. Gerasimov<sup>1,2</sup>

<sup>1</sup>Institute of Monitoring of Climatic and Ecological Systems SB RAS, Tomsk, 634055, Russia

<sup>2</sup>Tomsk State University, Tomsk, 634050, Russia

<sup>3</sup>Tomsk Polytechnic University, Tomsk, 634050, Russia

<sup>4</sup>V.E. Zuev Institute of Atmospheric Optics SB RAS, Tomsk, 634055, Russia

Correspondence to: Vladislav V. Gerasimov (gvvsake@mail.ru)

**Abstract.** There are only four lidar stations in the world which have almost continuously performed observations of the stratospheric aerosol layer (SAL) state for over the last 30 years. The longest time series of the SAL lidar measurements have been accumulated at the Mauna Loa Observatory (Hawaii) since 1973, the NASA Langley Research Center (Hampton, Virginia) since 1974, and Garmisch-Partenkirchen (Germany) since 1976. The fourth lidar station we present started to perform routine observations of the SAL parameters in Tomsk (56.48° N, 85.05° E, Western Siberia, Russia) in 1986. In this paper, we mainly focus on and discuss the stratospheric background period from 2000 to 2005 and the causes of the SAL perturbations over Tomsk in the 2006–2015 period. During the last decade, volcanic aerosol plumes from tropical Mt. Manam, Soufriere Hills, Rabaul, Merapi, Nabro, and Kelut, and extratropical (northern) Mt. Okmok, Kasatochi, Redoubt, Sarychev Peak, Eyjafjallajökull, and Grimsvötn were detected in the stratosphere over Tomsk. When it was possible, we used the NOAA HYSPLIT trajectory model to assign aerosol layers observed over Tomsk to the corresponding volcanic eruptions. The trajectory analysis highlighted some surprising results. For example, in cases of the Okmok, Kasatochi, and Eyjafjallajökull eruptions, the HYSPLIT air-mass backward trajectories, started from altitudes of aerosol layers detected over Tomsk with a lidar, passed over these volcanoes on their eruption days at altitudes higher than the maximum plume altitudes given by the Smithsonian Institution Global Volcanism Program. An explanation of these facts is suggested. The role of both tropical and northern volcanoes eruptions in volcanogenic aerosol loading of the mid-latitude stratosphere is also discussed. In addition to volcanoes, we considered other possible causes of the SAL perturbations over Tomsk, i.e. the polar stratospheric cloud (PSC) events and smoke plumes from strong forest fires. At least two PSC events were detected in 1995 and 2007. We also make an assumption that both the Kelut volcano plume (Indonesia, February 2014) and smoke plumes from massive forest fires occurred in Canada (137 fires in the Northwest Territories, July 2014) and the USA (the Happy Camp Complex fire in California, August–October 2014), with equal probability, could be the cause of the SAL perturbations over Tomsk during the first quarter of 2015.



## 1 Introduction

Long-term studies show that the presence of various types of aerosol in the stratosphere is mainly caused by powerful volcanic eruptions (Robock, 2000; Robock and Oppenheimer, 2003). Volcanic eruptions are ranked in the volcanic explosivity index (VEI) category from 0 to 8 (Newhall and Self, 1982; Siebert et al., 2010). During Plinian or, more rarely, Vulcanian explosive eruptions with  $\text{VEI} \geq 3$ , volcanic ejecta and gases can directly reach the stratospheric altitudes, where the volcanogenic aerosol stays for a long time. Then this aerosol spreads throughout the global stratosphere in the form of clouds. The volcanogenic aerosol perturbs the radiation-heat balance of the atmosphere, and thus, significantly affects the atmospheric dynamics (Timmreck, 2012; Driscoll et al., 2012). The injection of volcanogenic aerosol particles into the stratosphere leads to a considerable increase of their specific surface area and, therefore, to activation of heterogeneous chemical reactions on the surface of these particles. The reactions can result in, e.g., stratospheric ozone depletion (Hofmann and Solomon, 1989; Prather, 1992; Randel et al., 1995). Moreover, the long-term presence of volcanogenic aerosol clouds in the stratosphere also leads to cooling of the underlying surface and near-surface atmosphere due to the aerosol scattering and extinction of the direct solar radiation (Stenchikov et al., 2002). The latter effect is the basis for several geoengineering projects on artificial climate control (Crutzen, 2006; Robock et al., 2009; Kravitz and Robock, 2011; Laakso et al., 2016). These projects require information on aerosol cloud transport in the stratosphere.

Among various techniques for stratospheric aerosol measurements, the lidar remote sensing techniques are the most sensitive and have high spatial and temporal resolution. The number of lidar stations for stratospheric aerosol monitoring significantly increased throughout the world soon after the large volcanic eruption of Mt. Pinatubo (Philippines, 15 June 1991;  $\text{VEI} = 6$ ), the most powerful volcanic eruption of the 20th century after the Novarupta volcano eruption (the Alaska Peninsula, 6 June 1912;  $\text{VEI} = 6$ ; Fierstein and Hildreth, 1992). Some of these lidar stations formed continuous lidar observation networks, such as the Network for the Detection of Stratospheric Change (NDSC; now: NDACC, Network for the Detection of Atmospheric Composition Change; <http://www.ndsc.ncep.noaa.gov>), the European Aerosol Research Lidar Network (EARLINET; Bösenberg et al., 2003), and the Asian Dust and aerosol lidar observation Network (AD-Net; Murayama et al., 2000). However, before the Pinatubo eruption, only several individual lidars provided continuous monitoring of the stratosphere. The longest time series of the stratospheric aerosol layer (SAL) lidar measurements have been accumulated at the Mauna Loa Observatory (Hawaii) since 1973 (Barnes and Hofmann, 1997; Barnes and Hofmann, 2001), the NASA Langley Research Center (Hampton, Virginia) since 1974 (Woods and Osborn, 2001), and Garmisch-Partenkirchen (Germany) since 1976 (Trickl et al., 2013).

The first lidar observations of the SAL parameters in the USSR were performed at the Institute of Atmospheric Optics (IAO) of the Siberian Branch of the USSR Academy of Sciences (now: V.E. Zuev Institute of Atmospheric Optics of the Siberian Branch of the Russian Academy of Sciences), located in Tomsk, in 1975 (Zuev, 1982). A layer near 19 km altitude with increased stratospheric aerosol concentration due to the sub-Plinian eruption of Fuego volcano (Guatemala, 14 October 1974;  $\text{VEI} = 4$ ) was detected at that time.



Tomsk (56.48° N, 85.05° E, Western Siberia, Russia) is located in the central part of the Eurasian continent. The information on the atmosphere over the vast area of Siberia is poorly presented in various databases. Therefore, the lidar measurements time series accumulated in Tomsk are definitely unique and can be useful, e.g., in studying climate change. A new lidar station was designed and implemented at the IAO in 1985 for continuous monitoring of the SAL volcanogenic perturbations and other stratospheric parameters over Tomsk. The monitoring started at the end of 1985 and is ongoing at the present time (i.e. more than 30 years). In 2004 the lidar station in Tomsk was integrated into the Lidar Network for atmospheric monitoring in the Commonwealth of Independent States (CIS-LiNet; Chaykovskii et al., 2005; Zuev et al., 2009). The CIS-LiNet has been established by six lidar teams from Belarus, Russia, and the Kyrgyz Republic.

The detection of high aerosol concentration in the stratosphere over Tomsk after the Nevado del Ruiz volcano eruption (Colombia, 13 November 1985; VEI = 3) marked the beginning of routine lidar observations in 1986 (El'nikov et al., 1988). Definitely, the detection and subsequent monitoring of strong SAL perturbations by volcanogenic aerosol after the Pinatubo eruption were the major events during the first decade of lidar observations in Tomsk. The data of lidar measurements made in Tomsk over the 1986–2000 period were summarized and analyzed by Zuev et al. (1998) and Zuev et al. (2001).

In this paper, we mainly focus on and discuss: 1) the stratospheric background period from 2000 to 2005; 2) the SAL volcanogenic perturbations during the last decade (2006–2015); and 3) the potential detection of polar stratospheric clouds over Tomsk. The role of strong forest fires in the SAL perturbations is discussed. A brief review of previous lidar observations in Tomsk during the 1986–1999 period is also given.

## 2 Lidar instruments and methods

Regular monitoring of the SAL parameters over Tomsk was started at the IAO with a single-wavelength aerosol lidar in January 1986. A pulsed mode Nd:YAG laser LTI-701 operating at a wavelength of 532 nm with 1 W average power at a pulse repetition rate of 3 kHz was used as the lidar transmitter (El'nikov et al., 1988). The lidar backscattered signals were collected by a Newtonian receiving telescope with a mirror of 1 m diameter and a 2 m focal length. The signals were registered with a vertical resolution of 374 m by a photomultiplier tube (PMT) FEU-130 operating in the photon counting mode. The first results of stratospheric ozone measurements were obtained with a modified version of the IAO lidar in 1989 (El'nikov et al., 1989). In 1991, the IAO lidar system was updated with a receiving telescope with a mirror of 2.2 m diameter and a 10 m focal length. Note that this 2.2 m telescope can be used both as Newtonian and prime-focus depending on the remotely sensed object and selected lidar transmitter wavelength. Since 1994, the IAO lidar system has been named the Siberian Lidar Station (SLS; Zuev, 2000). Now the SLS represents a multichannel station for regular measurements of aerosol parameters, ozone content and vertical distribution, and for temperature retrievals in the troposphere and stratosphere. The receiving telescopes with the main mirror diameters of 2.2, 1, 0.5, and 0.3 m and lasers operating in the wavelength range 271–1064 nm are used at the SLS for these purposes.



The SLS aerosol channel we consider uses a Nd:YAG laser as the channel transmitter and a Newtonian telescope with a mirror diameter of 0.3 m and a focal length of 1 m as the channel receiver. The laser (LS-2132T-LBO model, LOTIS TII Co., the Republic of Belarus) can operate at wavelengths of 1064, 532, and 355 nm with 200, 100, and 40 mJ pulse energies, respectively, at a pulse repetition rate of 20 Hz. The backscattered signals from altitudes up to the stratopause (~50 km) are registered with a vertical resolution of 100 m by R7206-01 and R7207-01 PMTs (Hamamatsu Photonics, Japan) at used wavelengths of 532 and 355 nm, respectively. The PMTs operate in the photon counting mode. Two shutdown periods of the SLS aerosol channel from July 1997 to May 1999 and from February to September 2014 were due to the maintenance of the channel laser, and the rearrangement and improvement of the SLS.

We use the scattering ratio  $R(H)$  to describe the stratospheric aerosol vertical distribution, i.e.

$$R(H) = \frac{\beta_{\pi}^m(H) + \beta_{\pi}^a(H)}{\beta_{\pi}^m(H)} = 1 + \frac{\beta_{\pi}^a(H)}{\beta_{\pi}^m(H)}, \quad (1)$$

where  $\beta_{\pi}^m(H)$  and  $\beta_{\pi}^a(H)$  are the molecular (Rayleigh) and aerosol (Mie) backscatter coefficients, respectively. The detected lidar signals were calibrated by normalizing them to the molecular backscatter signal from aerosol-free altitudes above the SAL, i.e.  $H_0 \geq 30$  km ( $H_0$  is called the calibration altitude). The calibration method of lidar signals against the molecular backscatter coefficient  $\beta_{\pi}^m(H)$  is described in detail by, e.g., Measures (1984).

We use the integrated aerosol backscatter coefficient  $B_{\pi}^a$  to describe the temporal dynamics (time series) of stratospheric aerosol loading over Tomsk. The coefficient is calculated for a certain range of stratospheric altitudes ( $H_1; H_2$ )

$$B_{\pi}^a = \int_{H_1}^{H_2} \beta_{\pi}^a(H) dH. \quad (2)$$

Here  $H_1$  is the local tropopause altitude or slightly above, where upper-tropospheric aerosol does not contribute to the value of  $B_{\pi}^a$ , and  $H_2$  corresponds to the calibration altitude  $H_0 = 30$  km. In our case, the tropopause altitude over Tomsk varies from ~11 to 13 km, depending on season, and therefore, we set  $H_1 = 15$  km.

Various data on volcanic eruptions were taken from the Smithsonian Institution Global Volcanism Program (GVP; <http://volcano.si.edu/>; Section: Reports; Subsections: Smithsonian/USGS Weekly Volcanic Activity Report and Bulletin of the Global Volcanism Network). To study the SAL volcanogenic perturbations, we also analyze air-mass backward trajectories started from aerosol layers observed over Tomsk. All the trajectories were calculated by using the NOAA's Hybrid Single-Particle Lagrangian Integrated Trajectory model (HYSPLIT; Stein et al., 2015; <http://ready.arl.noaa.gov/HYSPLIT.php>) and the HYSPLIT-compatible NOAA meteorological data from the Global Data Assimilation System (GDAS) one-degree archive.

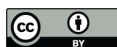

### 3 Results of the SAL lidar observations over Tomsk

#### 3.1 Time series of the integrated stratospheric backscatter coefficient (1986–2015)

The 30-year time series of the integrated stratospheric backscatter coefficient  $B_{\pi}^a$ , obtained from the SAL lidar observations performed at  $\lambda = 532$  nm in Tomsk from 1986 to 2015, is presented in Fig. 1. The backscatter coefficients are integrated over the 15–30 km stratospheric layer described above.

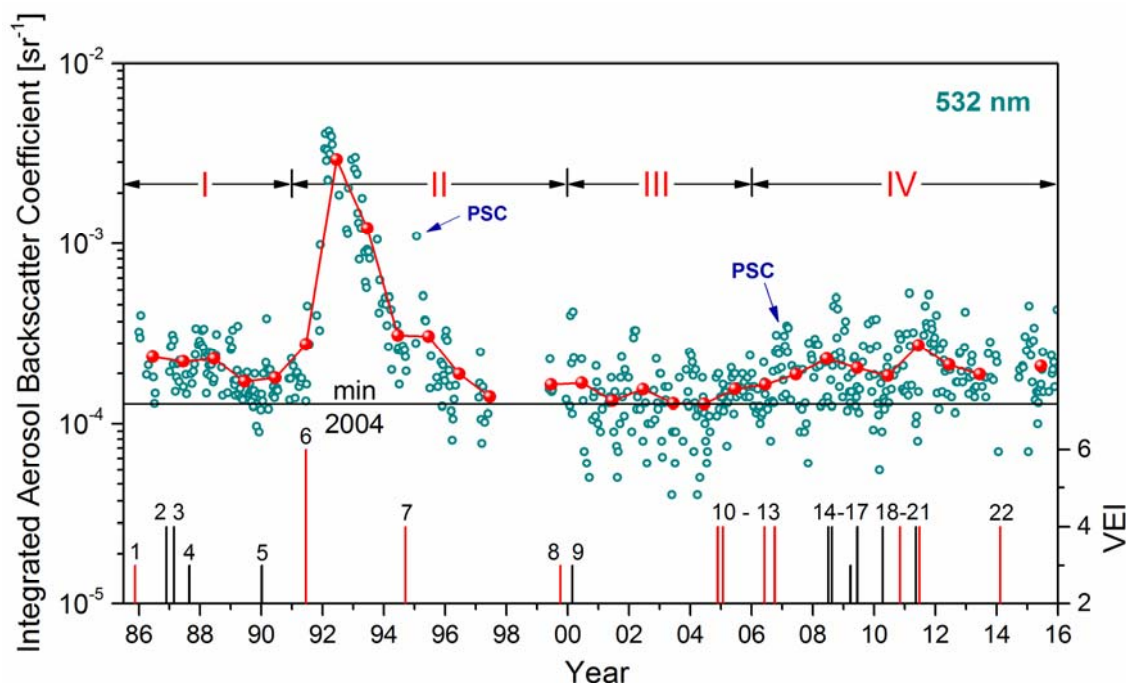

**Figure 1.** 30-year time series of the integrated stratospheric backscatter coefficient at  $\lambda = 532$  nm over Tomsk between 15 and 30 km. Open dark-green circles denote the 10-day average  $B_{\pi}^a$  values. Solid red circles show the annual average  $B_{\pi}^a$  values assigned to July of each year. Black and red vertical bars at the bottom of the figure indicate volcanic eruptions (ranked on VEI) which caused the SAL volcanogenic perturbations over Tomsk from 1986 to the present day (see also Table 1). The red bars correspond to tropical volcanic eruptions, whereas the black ones correspond to eruptions of extratropical volcanoes located in the Northern Hemisphere. PSC: polar stratospheric clouds.

We divided the time series into the following four intervals. The 1986–1990 period (I) reflects the final SAL relaxation after the explosive eruption of El Chichon volcano (Mexico, 29 March 1982, VEI = 5) together with small SAL perturbations after several less powerful volcanic eruptions during the period (see Table 1). The next 1991–1999 period (II) is mainly determined by the strong perturbation and subsequent long-term relaxation of the SAL after the Pinatubo eruption. The 2000–2005 period (III) is marked by reaching the background level of  $B_{\pi}^a$  under comparatively small SAL volcanogenic



perturbations. The last 2006–2015 period (IV) reflects an increase in  $B_{\pi}^a$  (i.e. in stratospheric aerosol loading) due to an increase in volcanic activity. Table 1 contains all volcanic eruptions that have caused the SAL perturbations detected over Tomsk since 1986. The thin horizontal line in Fig. 1 indicates the minimum value of the annual average  $B_{\pi}^a$  reached in 2004. This value equals to that determined in 1979 and considered as the background one (Trickl et al., 2013).

5

**Table 1.** List of volcanic eruptions that have caused the SAL volcanogenic perturbations detected over Tomsk from 1986 to the present day. The list was retrieved from the GVP data.  $H_{\text{MPA}}$ : maximum plume altitude.

| N  | Date/Period     | Volcano          | Location                             | $H_{\text{MPA}}$ , km | VEI      |
|----|-----------------|------------------|--------------------------------------|-----------------------|----------|
| 1  | 13 Nov. 1985    | Nevado del Ruiz  | Colombia (4.9° N, 75.3° W)           | 31                    | 3        |
| 2  | 20 Nov. 1986    | Chikurachki      | Kuril Islands (50.3° N, 155.5° E)    | 14                    | 4        |
| 3  | 23 Feb. 1987    | Kliuchevskoi     | Kamchatka (56.0° N, 160.6° E)        | 13.7                  | 4        |
| 4  | 28 Aug. 1987    | Cleveland        | Alaska (52.8° N, 169.9° W)           | 10.6                  | 3        |
| 5  | 2 Jan. 1990     | Redoubt          | Alaska (60. 5° N, 152.7° W)          | 13.5                  | 3        |
| 6  | 15 Jun. 1991    | Pinatubo         | Philippines (15.1° N, 120.3° E)      | 35                    | <b>6</b> |
| 7  | 19 Sep. 1994    | Rabaul           | Papua New Guinea (4.3° S, 152.2° E)  | 21                    | 4        |
| 8  | 5 Oct. 1999     | Guagua Pichincha | Ecuador (0.2° S, 78.6° W)            | 20                    | 3        |
| 9  | 26 Feb. 2000    | Hekla            | Iceland (64.0° N, 19.7° W)           | 15                    | 3        |
| 10 | 24 Nov. 2004    | Manam            | Papua New Guinea (4.1° S, 145.0° E)  | 18                    | 4        |
| 11 | 27 Jan. 2005    | Manam            | Papua New Guinea (4.1° S, 145.0° E)  | 24                    | 4        |
| 12 | 20 May 2006     | Soufriere Hills  | West Indies (16.7° N, 62.2° W)       | 17                    | 4        |
| 13 | 7 Oct. 2006     | Rabaul           | Papua New Guinea (4.3° S, 152.2° E)  | 18                    | 4        |
| 14 | 12 Jul. 2008    | Okmok            | Aleutian Islands (53.4° N, 168.1° W) | 15                    | 4        |
| 15 | 7 Aug. 2008     | Kasatochi        | Aleutian Islands (52.2° N, 175.5° W) | 14                    | 4        |
| 16 | 22 Mar. 2009    | Redoubt          | Alaska (60. 5° N, 152.7° W)          | 20                    | 3        |
| 17 | 11–16 Jun. 2009 | Sarychev Peak    | Kuril Islands (48.1° N, 153.2° E)    | 21                    | 4        |
| 18 | 14–17 Apr. 2010 | Eyjafjallajökull | Iceland (63.6° N, 19.6° W)           | 9                     | 4        |
| 19 | 4–5 Nov. 2010   | Merapi           | Indonesia (7.5° S, 110.4° E)         | 18.3                  | 4        |
| 20 | 21 May 2011     | Grimsvötn        | Iceland (64.4° N, 17.3° W)           | 20                    | 4        |
| 21 | 13 Jun. 2011    | Nabro            | Eritrea (13.4° N, 41.7° E)           | 13.7                  | 4        |
| 22 | 13 Feb. 2014    | Kelut            | Indonesia (7.9° S, 112.3° W)         | 17                    | 4        |





As noted above, the results of aerosol lidar observations at the SLS during the periods I and II were described by Zuev et al. (1998) and Zuev et al. (2001). Next, we consider the temporal dynamics of stratospheric aerosol loading over Tomsk during the periods III and IV.

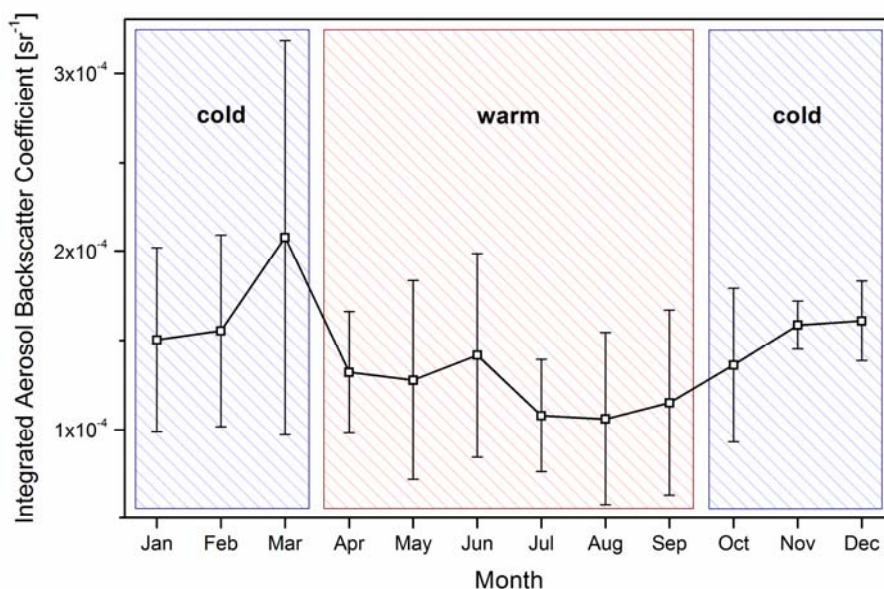

**Figure 2.** Intra-annual variation of the monthly average  $B_{\pi}^a$  values averaged over six years (2000–2005) of the SAL lidar observations.

Low explosive volcanic activity during the comparatively long post-Pinatubo period led to a gradual reduction in volcanogenic aerosol loading of the stratosphere down to the background level of  $B_{\pi}^a$  reached after 1999. Note that only the after-effect of the Rabaul volcano eruption (Papua New Guinea, 19 September 1994; VEI = 4) was definitely detected over Tomsk in the post-Pinatubo period (II). The minimum annual average  $B_{\pi}^a$  values were reached in 2003–2004. Thus, we can consider the state of the SAL over Tomsk as background during the period III, when the annual average  $B_{\pi}^a$  values were less than those in the pre-Pinatubo period (1989–1991). The absence of significant SAL volcanogenic perturbations allowed studying the intra-annual variation of the background  $B_{\pi}^a$  value in the stratosphere over Tomsk during the period III (Fig. 2). The behavior of the  $B_{\pi}^a$  curve is seen in Fig. 2 to clearly demonstrate the influence of the Brewer-Dobson circulation on the aerosol state of the mid-latitude stratosphere during a year. One can also see that the stratospheric aerosol loading is minimal in the warm half-year (i.e. from April to September), when the zonal transport dominates. On the other hand, the meridional air mass transport from tropical into extratropical (middle) latitudes intensifies in the cold half-year (from October to March) and, therefore, it provides the mid-latitude stratosphere with additional aerosol mass from the stratospheric tropical aerosol reservoir. The role of the tropical reservoir in stratospheric aerosol loading can be estimated from inter-annual variations of  $B_{\pi}^a$  values separately averaged over the warm and cold half-years during the last 30 years (Fig. 3). As seen in Fig. 3, the  $B_{\pi}^a$



value is mostly higher in the cold half-year than that in the warm one. Furthermore, these “cold” and “warm” average  $B_{\pi}^a$  values are modulated by the quasi-biennial oscillations (QBO; <http://www.geo.fu-berlin.de/en/met/ag/strat/produkte/qbo/>).

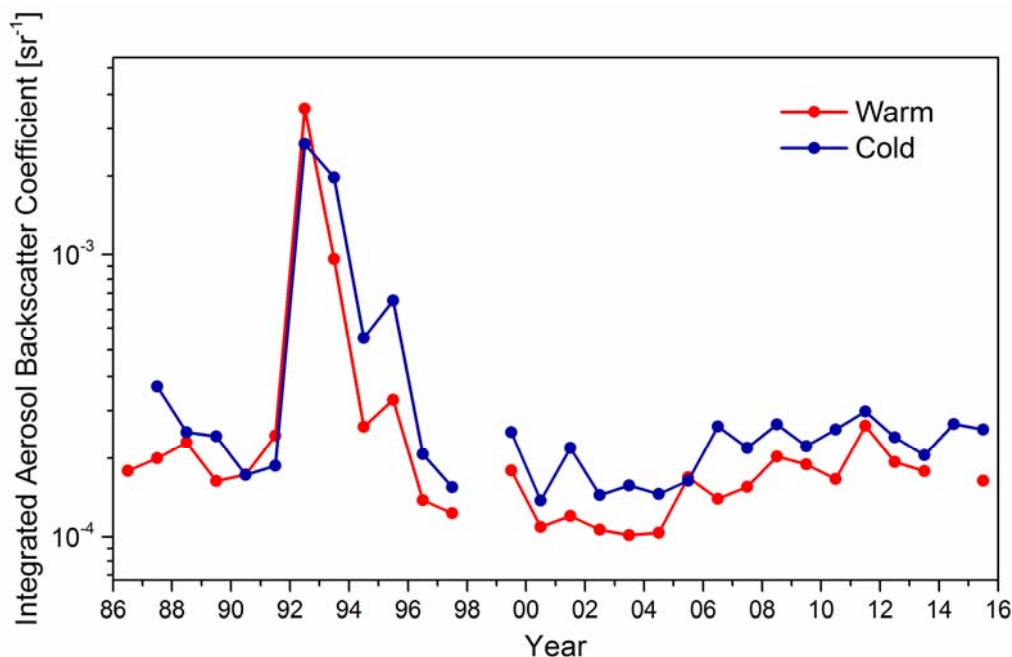

**Figure 3.** Inter-annual variations of  $B_{\pi}^a$  values (in the stratosphere over Tomsk) separately averaged over the warm and cold half-years.

5

Turning to Fig. 1, one can see that there is a positive trend in stratospheric aerosol loading over Tomsk caused by an increase in the number of explosive volcanic eruptions with VEI = 4 during the last decade (period IV). A small increase in the  $B_{\pi}^a$  value started in 2005 due to two Manam volcano eruptions occurred in Papua New Guinea closely spaced in time (Table 1). Soon after, in 2006, two relatively strong eruptions of the Soufriere Hills and Rabaul tropical volcanoes (Table 1) additionally enriched the stratospheric tropical aerosol reservoir. As a result, two corresponding volcanic aerosol peaks were observed in the stratosphere over Tomsk in October–December 2006 and January–March 2007 due to the meridional transport intensified in the cold period (Fig. 4). These peaks determined the increase of the annual average  $B_{\pi}^a$  values in 2006 and 2007.

The further increase of the annual average  $B_{\pi}^a$  value in 2008 was due to explosive eruptions of two northern volcanoes located in the Aleutian Islands: Okmok and Kasatochi (Table 1; Schmale et al., 2010). In the following two years, 2009–2010, there were only two eruptions of northern volcanoes with VEI = 4, namely Sarychev Peak (the Kuril Islands, 11 June 2009) and Eyjafjallajökull (Iceland, 14 April 2010). Note that the eruption plumes of Eyjafjallajökull mostly did not exceed the tropopause altitude over the volcano. This can explain a gradual decrease in stratospheric aerosol loading from 2008 to 2010 (see Fig. 1). However, a new increase in the annual average  $B_{\pi}^a$  value was observed in 2011. This increase resulted





from aerosol perturbations of the northern mid-latitude stratosphere after the explosive eruptions of Merapi, Grimsvötn, and Nabro volcanoes (all VEI = 4, Table 1). In the next sections we consider contributions of plumes from the volcanoes erupted in the period IV to the SAL volcanogenic perturbations over Tomsk, and also discuss other possible sources of the SAL perturbations.

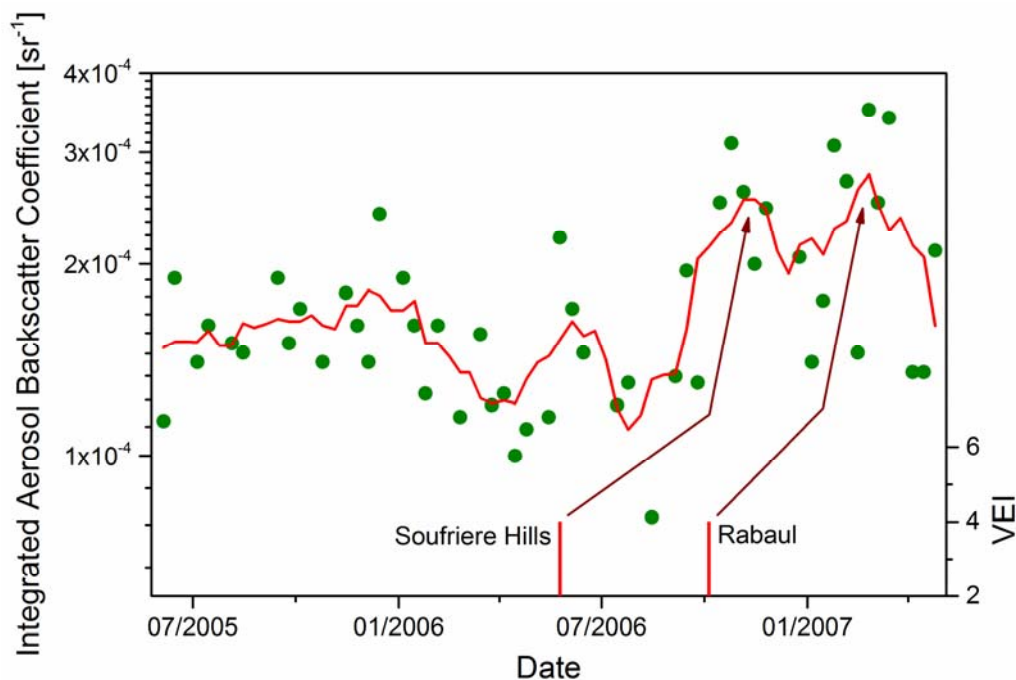

**Figure 4.** Two  $B_{\pi}^a$  value peaks observed in the stratosphere over Tomsk in October–December 2006 and January–March 2007 after the Soufriere Hills and Rabaul eruptions, respectively (Table 1). Solid green circles denote the 10-day average  $B_{\pi}^a$  values. The red curve denotes the  $B_{\pi}^a$  values smoothed by five-point averaging.

### 3.2 Detection of plumes from northern volcanoes in the stratosphere over Tomsk in 2008–2010

- 10 Detection of volcanic plumes over Tomsk is based on: 1) the use of the scattering ratio  $R(H)$  profiles retrieved from the lidar measurements between 12.5 and 30 km and 2) the assignment of observed aerosol layers to volcanic eruptions via the HYSPLIT model trajectory analysis, when possible.

#### 3.2.1 Okmok and Kasatochi

- 15 In summer 2008, two Aleutian volcanoes Okmok and Kasatochi started to erupt at 19:43 UTC on 12 July and between 23:00 UTC on 7 August and 05:35 UTC on 8 August, respectively (both VEI = 4). The plumes from these volcanoes considerably perturbed the SAL over Tomsk from August to October 2008, and the after-effects of their eruptions were detected up to January 2009. Vertical profiles of the scattering ratio  $R(H)$ , showing the detection of the Okmok and Kasatochi plumes over



Tomsk during these months, are presented in Fig. 5 as an example. In the August of 2008, the detected aerosol layers were related only to the Okmok plume, but in September of 2008, there was observed a superposition of plumes from both volcanoes. The trajectory analysis, made by using the NOAA HYSPLIT model, showed that the SAL perturbations at altitudes lower than 16 km were caused mostly by the Okmok plume, whereas the Kasatochi plume perturbed the SAL at altitudes higher than 16 km (Fig. 6). Figure 6a shows the air-mass backward trajectory started from the altitude of the  $R(H)$  profile maximum ( $\sim 15.1$  km a.s.l.) over Tomsk on 8 August at 02:00 LT (or on 7 August at 19:00 UTC). The trajectory passed over Okmok volcano on the eruption day, 12 July, at the altitude  $H_{\text{traj.}}^{\text{back.}} \approx 16$  km that is 1 km higher than the official maximum plume altitude (MPA; Table 1)  $H_{\text{MPA}}$ . Furthermore, Fig. 6b shows the backward trajectory started from the altitude of the  $R(H)$  maximum ( $\sim 16.3$  km a.s.l.) over Tomsk on 2 September at 00:00 LT (1 September, 17:00 UTC). The trajectory passed over Kasatochi volcano on the eruption day, 7 August, at the altitude  $H_{\text{traj.}}^{\text{back.}} \approx 16.4$  km that is 2.4 km higher than the official  $H_{\text{MPA}}$  (Table 1).

It should be noted that due to the zonal transport of air masses in the Northern Hemisphere lower stratosphere during summer seasons and vast geographical distance between Tomsk and the Aleutian Islands, both backward trajectories could hardly be expected to be equal to or shorter than two weeks. Therefore, these trajectories are slightly longer than those usually used in the HYSPLIT model and, thus, can be considered only as probable ones. Nevertheless, we made the trajectory analysis to assign the observed aerosol layers to the corresponding volcanic eruptions.

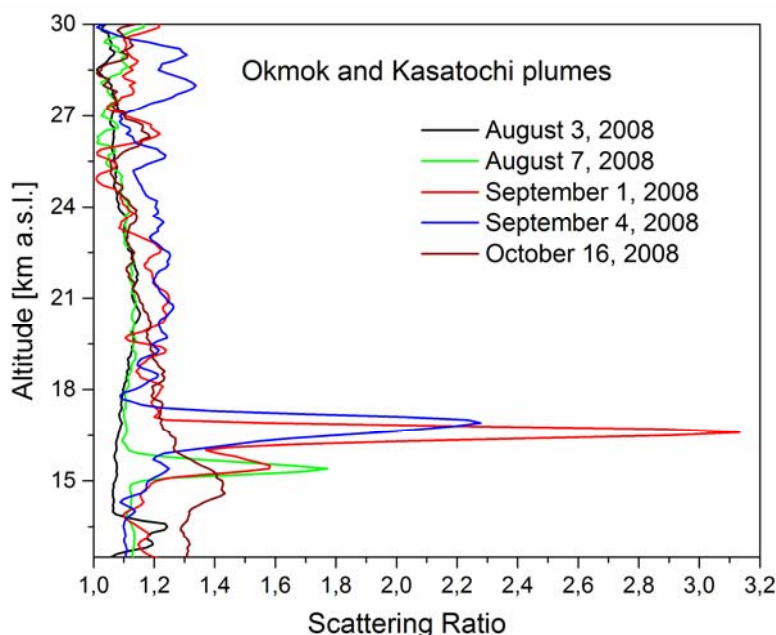

**Figure 5.** Detection of the Okmok and Kasatochi volcanic plumes in the stratosphere over Tomsk. The volcanoes started to erupt in the Aleutian Islands on 12 July and 7 August 2008, respectively.

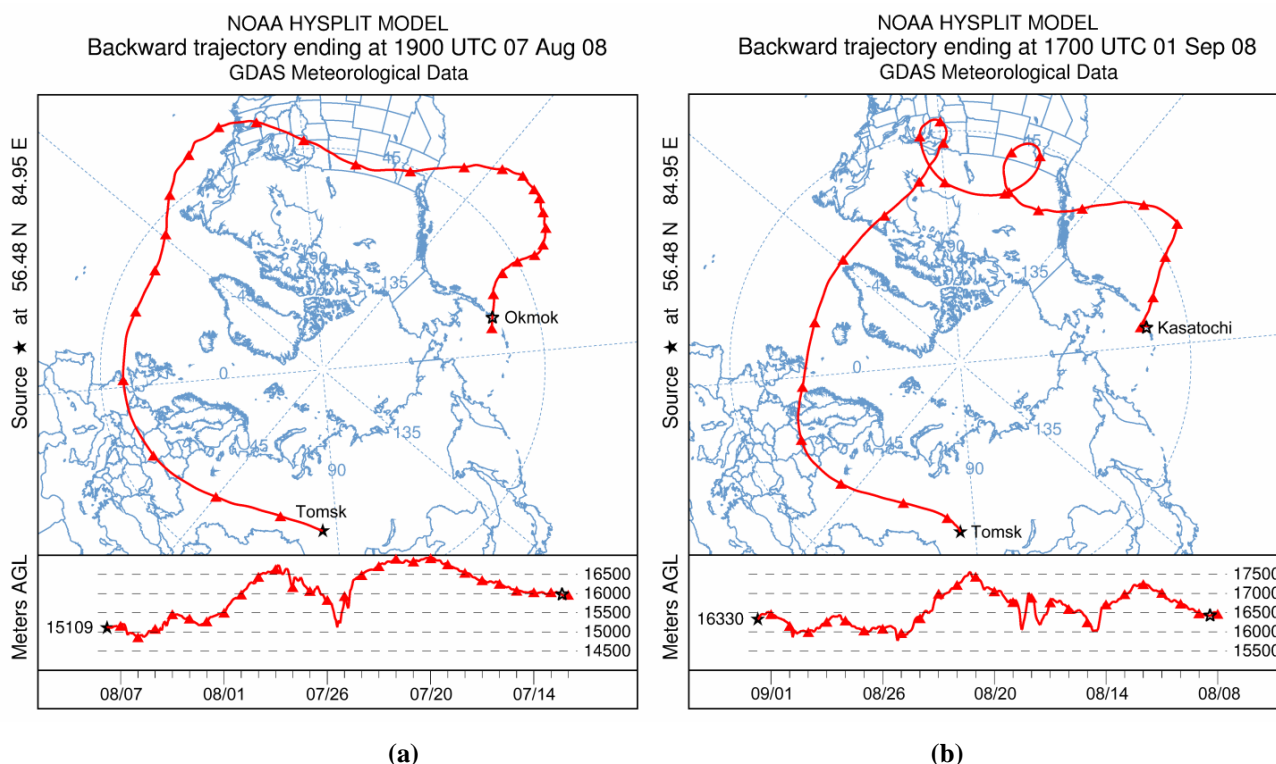

**Figure 6.** (a) Air-mass backward trajectory started from an altitude of ~15.1 km a.s.l. over Toms on 8 August 2008 at 02:00 LT (7 August, 19:00 UTC) and passed over Okmok volcano. (b) Air-mass backward trajectory started from an altitude of ~16.3 km a.s.l. over Toms on 2 September 2008 at 00:00 LT (1 September, 17:00 UTC) and passed over Kasatochi volcano.

### 3.2.2 Redoubt and Sarychev Peak

The SAL perturbations over Toms in 2009 were caused by the eruptions of two northern volcanoes Redoubt (Alaska, 15 March to 4 April; VEI = 3) and Sarychev Peak (the Kuril Islands, 11–16 June; VEI = 4). The Redoubt plumes caused insignificant SAL perturbations over Toms during the first two weeks of May 2009 (Fig. 7). Stronger and longer-lasting SAL perturbations were related to the Sarychev Peak volcano eruption. According to the GVP data, the official MPA was within the range of 8–16 km or even reached 21 km (GVP, 2009). The Sarychev Peak plumes were reliably detected in the stratosphere over Toms during July and August (Fig. 8), and weakly observed up to November 2009. For a trajectory analysis, we considered an aerosol layer observed over Toms at an altitude of ~13.1 km on 7 July at 02:30 LT (6 July, 19:30 UTC). As seen in Fig. 9, this layer is associated with the backward trajectory passed over Sarychev Peak volcano at an altitude of ~13.8 km on 15 June at the moment of the eruption, 17:30 UTC.

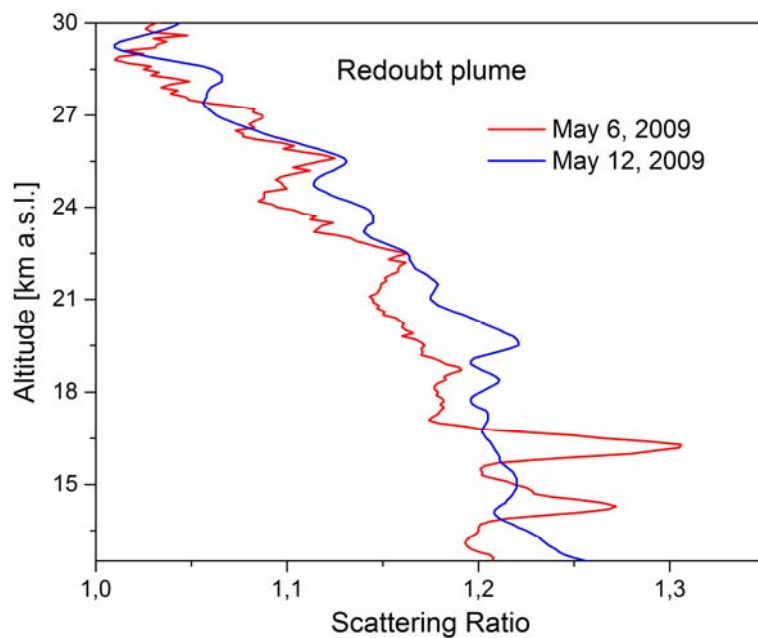

**Figure 7.** Detection of the Redoubt volcanic plumes in the stratosphere over Tomsk. The volcano erupted in Alaska from 15 March to 4 April 2009.

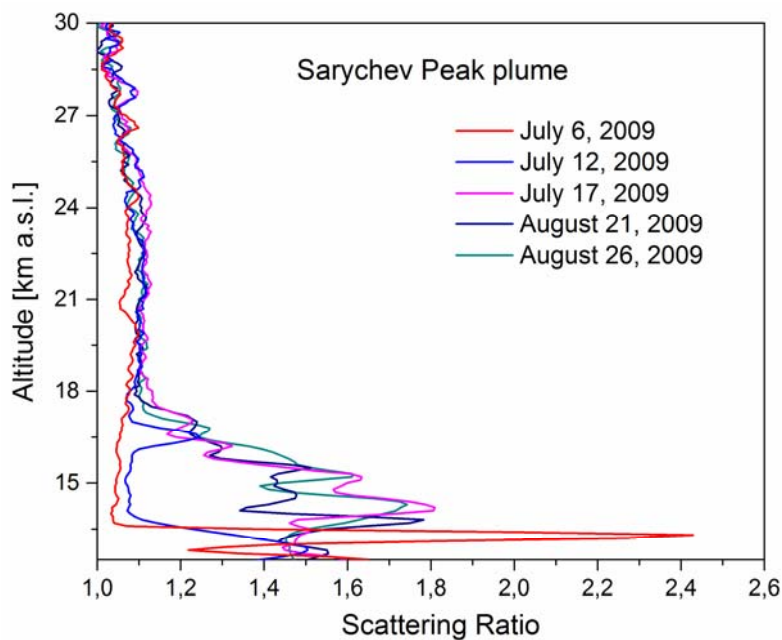

**Figure 8.** Detection of the Sarychev Peak volcanic plumes in the stratosphere over Tomsk. The volcano erupted in the Kuril Islands from 11 to 16 June 2009.

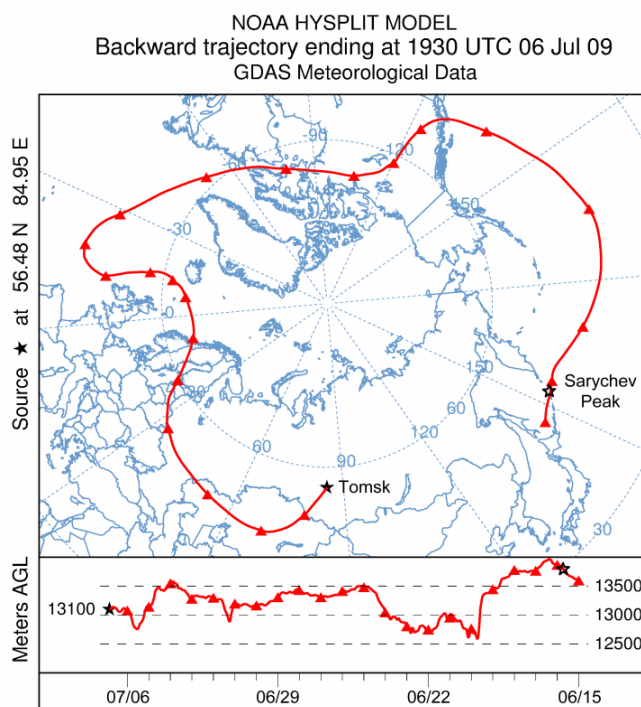

**Figure 9.** Air-mass backward trajectory started from an altitude of ~13.1 km a.s.l. over Tomsk on 7 July at 02:30 LT (6 July, 19:30 UTC).

### 3.2.3 Eyjafjallajökull

During April–May 2010, there was a series of explosive eruptions of the Icelandic volcano Eyjafjallajökull. These eruptions are noted for the subsequent extensive air travel disruption across large parts of Western Europe. According to the GVP data, the MPA occasionally reached 9 km (GVP, 2009), but did not exceed the local tropopause (GVP, 2010). However, lidar observations, performed in Tomsk on 20 and 26 April 2010, detected the presence of aerosol layers in the troposphere and lower stratosphere at altitudes up to 15 km (Fig. 10). As a comparison, aerosol lidar measurements at Garmisch-Partenkirchen revealed that the upper boundary of the observed aerosol layers from the Eyjafjallajökull volcanic plumes was ~14.3 km on 20 April, whereas the average altitude of the local tropopause was of ~10.2 km (Trickl et al., 2013).

Figure 11 shows the HYSPLIT air-mass backward trajectory started from an altitude of the detected aerosol layers (~11.6 km a.s.l.) over Tomsk on 21 April at 00:00 LT (20 April, 17:00 UTC). The trajectory passed over Eyjafjallajökull volcano on one of the eruption days, 16 April at 13:00 UTC, at the altitude  $H_{\text{traj}}^{\text{back}} \approx 10.7$  km that is clearly higher than  $H_{\text{MPA}} \leq 9$  km. This inconsistency between the altitudes  $H_{\text{traj}}^{\text{back}}$  and  $H_{\text{MPA}}$  ( $H_{\text{traj}}^{\text{back}}$  should normally be equal to or lower than  $H_{\text{MPA}}$ ) is discussed in Sect. 4. Note also that, according to the Icelandic meteorological station Keflavik, the local tropopause altitude went down to ~7 km on 16 April after 12:00 UTC (Trickl et al., 2013). Hence, the Eyjafjallajökull volcanic plumes reached altitudes of 8–9 km on that day and directly entered the local lower stratosphere.

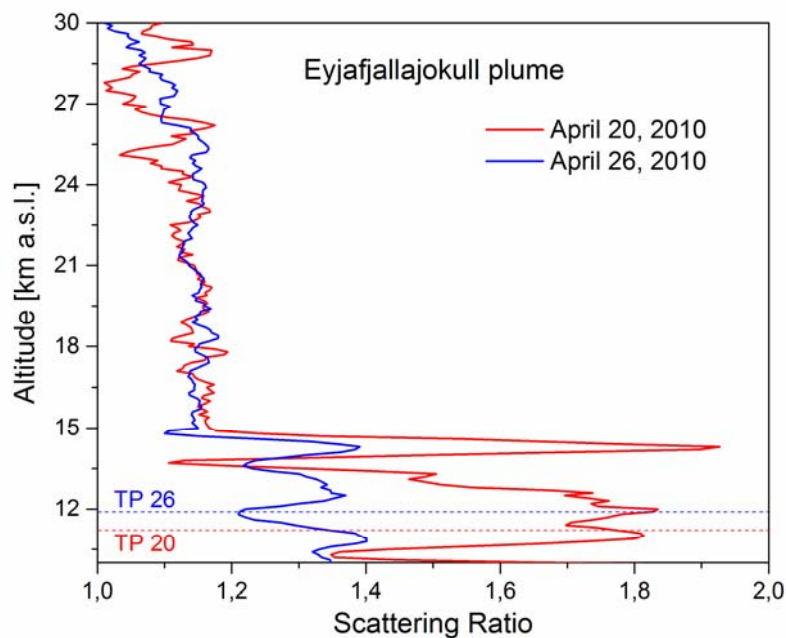

**Figure 10.** Detection of the Eyjafjallajökull volcanic plumes in the upper troposphere and lower stratosphere over Tomsk. The volcano erupted in Iceland from 14 to 17 April 2010. The tropopause altitude over Tomsk was of 11.2 km on 20 April and 11.9 km on 26 April.

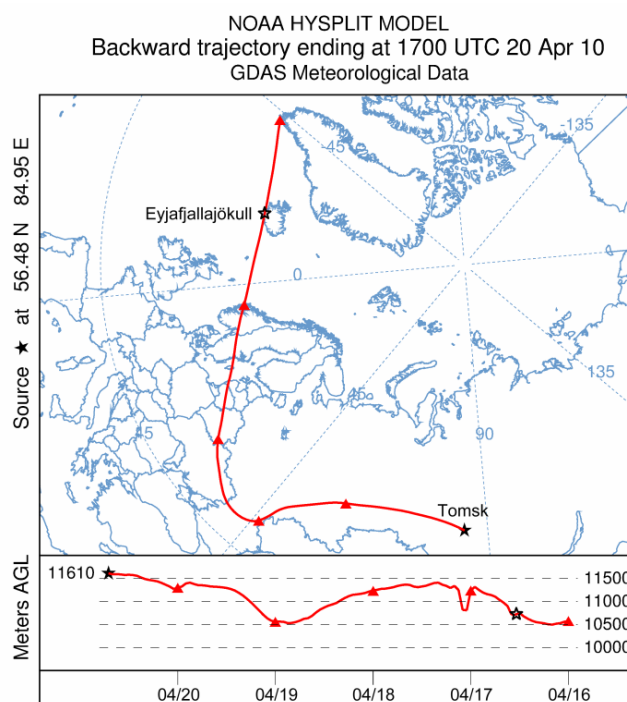

**Figure 11.** Air-mass backward trajectory started from an altitude of ~11.6 km a.s.l. over Tomsk on 21 April 2010 at 00:00 LT (20 April, 17:00 UTC) and passed over Eyjafjallajökull volcano.





### 3.3 Detection of volcanic plumes in the stratosphere over Tomsk in 2011

High values of  $B_{\pi}^a$  were detected during the SAL lidar observations in Tomsk from February to April and from August to December 2011. The “first” wave of the SAL perturbations in the winter-spring period was caused by the Merapi volcano eruption (Indonesia, 4–5 November 2010; VEI = 4), whereas the “second” wave was due to the eruptions of the northern  
 5 volcano Grimsvötn (Iceland, 21 May 2011; VEI = 4) and the tropical volcano Nabro (Eritrea, 13 June 2011; VEI = 4).

#### 3.3.1 Merapi

High values of  $B_{\pi}^a$  were detected in the stratosphere over Tomsk from February to April 2011, i.e. 3–5 months after the Merapi volcano eruption. As an example, Fig. 12 presents an aerosol layer observed over Tomsk at an altitude of ~18 km on 18 April 2011. The Merapi plume (Table 1) supplied the stratospheric tropical reservoir with long-lived volcanic aerosol.  
 10 The SAL perturbations, reflected by increased  $B_{\pi}^a$  and  $R(H)$  values during the winter and spring of 2011, were due to the meridional air mass transport from the tropics into northern mid-latitudes in this cold period (see Sect. 3.1). Note also that a significant decrease in the total ozone content was observed over Tomsk at the same period of time (April 2011), which is evidence of stratospheric ozone depletion caused by the Merapi aerosol plume (Zuev et al., 2016).

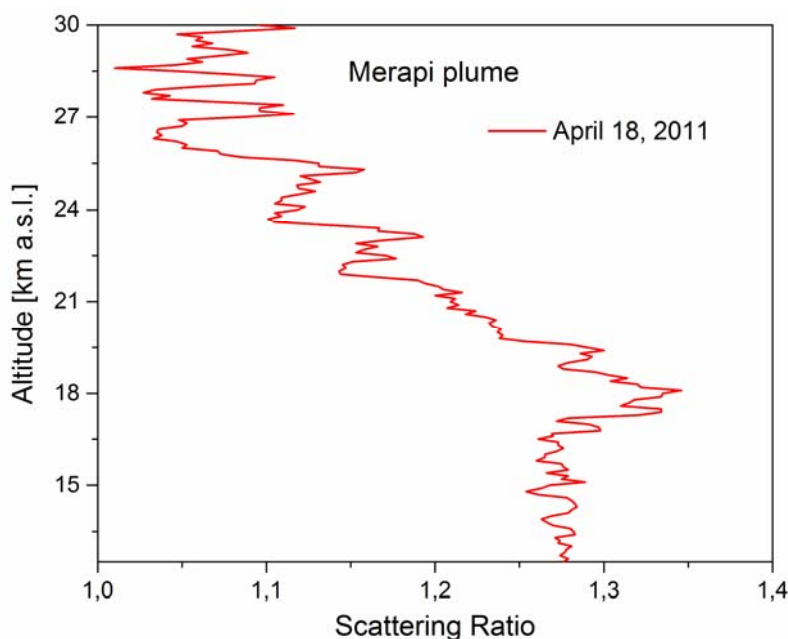

**Figure 12.** Detection of the Merapi volcanic plume in the stratosphere over Tomsk. The volcano erupted in Indonesia from 4 to 5 November 2010.



### 3.3.2 Grimsvötn and Nabro

In 2011, two volcanoes with VEI = 4 Grimsvötn and Nabro started to erupt on 21 May at 19:25 UTC and 13 June after 22:00 UTC, respectively. Grimsvötn volcano erupted ash clouds and gases directly into the stratosphere at an altitude of 20 km, whereas the Nabro volcanic plume did not exceed the local tropopause altitude. Nevertheless, Bourassa et al. (2012) and Robock (2015) showed that a considerable part of the Nabro volcanic aerosol and gases, erupted into the upper troposphere, was able to enter the mid-latitude stratosphere due to deep convection and vertical air transport associated with the strong Asian summer monsoon anticyclone. The SAL perturbations by volcanogenic aerosol after the eruptions of both volcanoes were observed in the lower stratosphere over Tomsk from August to November 2011 (Fig. 13). All the scattering ratio profiles shown in Fig. 13, with equal probability, represent superpositions of plumes from both Grimsvötn and Nabro volcanoes.

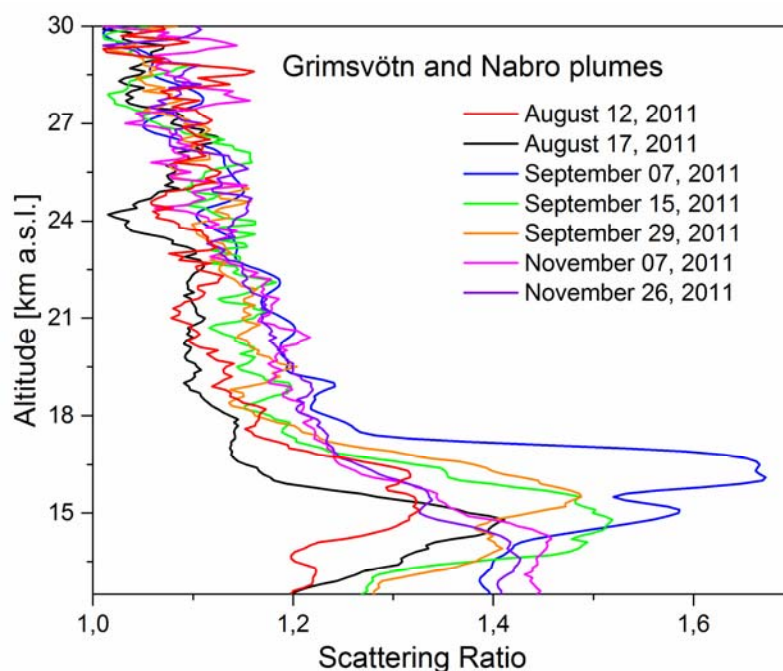

**Figure 13.** Detection of the Grimsvötn (Iceland) and Nabro (Eritrea) volcanic plumes in the stratosphere over Tomsk. The volcanoes started to erupt on 21 May and 13 June 2011, respectively.

### 3.4 Polar stratospheric clouds

Occasional perturbations of the mid-latitude SAL can also be related to the occurrence of polar stratospheric clouds (PSCs) in winter periods. PSCs are known to form at extremely low temperatures (lower than  $-78^{\circ}\text{C}$ ) mainly on sulfuric acid ( $\text{H}_2\text{SO}_4$ ) aerosols, acting as condensation nuclei and formed from sulfur dioxide ( $\text{SO}_2$ ; Finlayson-Pitts and Pitts, 2000). Therefore, the injections of volcanogenic  $\text{H}_2\text{SO}_4$  aerosols or/and  $\text{SO}_2$  into the stratosphere often lead to PSC formation, if



the air temperature  $< -78$  °C. The Northern Hemisphere stratosphere is usually cooled to the required low temperatures inside the Arctic stratospheric polar vortex in cold seasons (Newman, 2010). The Arctic polar vortex sometimes deforms and stretches to mid-latitudes including Siberian regions. Hence, the stratospheric temperature over Tomsk can occasionally be cooled lower than  $-78$  °C, when Tomsk is inside the polar vortex. As stratospheric ozone is depleted due to heterogeneous chemical reactions, releasing chlorine on the surfaces of PSCs (Solomon, 1999), the occurrence of PSCs in the mid-latitudes should be followed by a significant decrease in the total ozone content. Thus, the detection of aerosol layers in the stratosphere at extremely low temperatures together with a considerable decrease in the total ozone content can be indicative of the presence of PSCs.

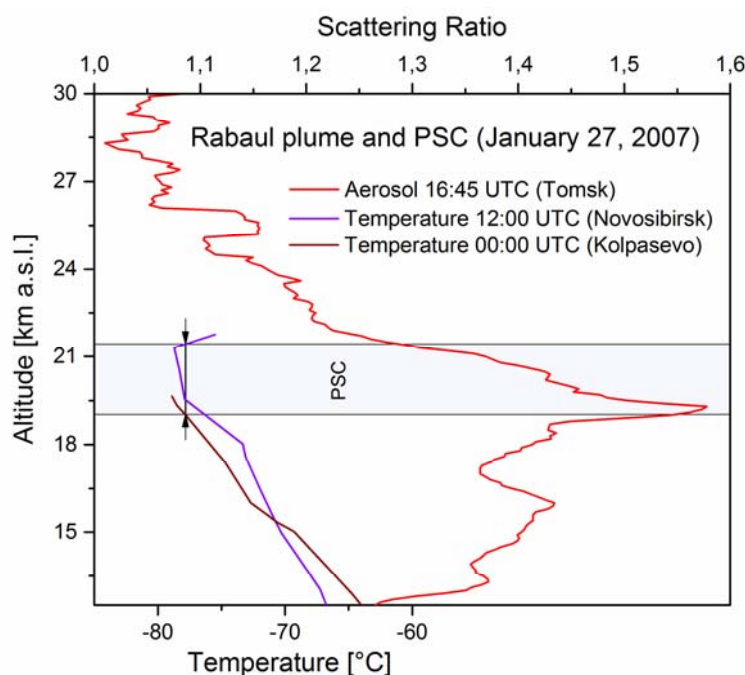

**Figure 14.** Detection of the Rabaul volcanic plume together with PSCs, formed at extremely low temperatures ( $< -78$  °C), in the stratosphere over Tomsk. Rabaul volcano erupted in Papua New Guinea on 7 October 2006. Temperature profiles were retrieved from radiosondes launched on 27 January 2007 in Kolpashevo (station 29231) at 00:00 UTC and in Novosibirsk (station 29634) at 12:00 UTC (WWW, 2007).

The first lidar PSC observations (over Tomsk) that met the criteria of low temperature and total ozone content, were made at  $\lambda = 1064$  nm January 1995 (Zuev and Smirnov, 1997). More precisely, some dense aerosol layers were detected at altitudes in the range of 15 to 19 km on 24 and 26 January. The maximum scattering ratio  $R(H)$  was more than 14 at an altitude of 18.1 km. The stratospheric temperature was lower than  $-80$  °C and the total ozone content was less than 70 percent of the norm. The formation of these dense PSCs was caused by high concentrations of  $H_2SO_4$  aerosols resulted from the eruptions of Pinatubo (1991) and Rabaul (1994) volcanoes.



Another event of PSCs over Tomsk was observed at  $\lambda = 532$  nm on 27 January 2007 (Fig. 14) as an after-effect of the Rabaul volcano eruption occurred on 7 October 2006 (Table 1). As seen in Fig. 14, the maximum scattering ratio  $R(H)$  was more than 1.55 at an altitude of 19.3 km. According to the data of the two nearest to Tomsk meteorological stations, launching radiosondes twice a day and situated in Novosibirsk (55.02° N, 82.92° E) and Kolpashevo (58.32° N, 82.92° E), the stratospheric temperature was lower than  $-78$  °C at altitudes between 19 and 21.5 km (WWW, 2007) during the lidar measurements. Moreover, the stratospheric ozone was considerably depleted at that time and the total ozone content was 30 percent of the norm (Zuev et al., 2008). Thus, PSCs were detected at least twice (in 1995 and 2007) during 30 years of stratospheric aerosol lidar measurements in Tomsk.

### 3.5 The latest SAL perturbations over Tomsk (2012–2015)

In summer 2011, the annual average  $B_{\pi}^a$  value started to decrease and the SAL state over Tomsk started to relax to its background one (Fig. 1). However, a marked increase in  $B_{\pi}^a$  value was observed in the winter of 2015. Figure 15 shows several perturbed scattering ratio profiles retrieved from the SLS aerosol lidar measurements between 29 January and 30 March, 2015. During that period of time, the Kelut volcano eruption as well as massive forest fires could probably be a source of the SAL perturbations over Tomsk.

An explosive eruption of the tropical volcano Kelut occurred in East Java, Indonesia, on 13 February 2014 (Table 1). The MPA  $H_{\text{MPA}}$  value for this eruption was initially estimated by both ground and space monitoring systems to be  $\sim 17$  km. On the other hand, according to the data from the space-borne lidar CALIOP (Cloud-Aerosol Lidar with Orthogonal Polarization) onboard the CALIPSO (Cloud-Aerosol Lidar and Infrared Pathfinder Satellite Observation) satellite ([http://www.nasa.gov/mission\\_pages/calipso/main/index.html](http://www.nasa.gov/mission_pages/calipso/main/index.html)), a rapidly rising portion of the Kelut plume ejected material up to an altitude exceeding  $\sim 26$  km, i.e. directly into the tropical stratosphere. Most of the less rapidly rising plume portions remained lower, at altitudes of 19–20 km (GVP, 2014). The Kelut plume passed over the Indian Ocean to the West, toward the African continent, with a small deviation to the South. Sandhya et al. (2015) showed that a part of this plume could turn back and pass over the South end of Hindustan. Thus, the Kelut plume enriched the stratospheric tropical aerosol reservoir at least over the Indian Ocean. This led to the increasing annual average  $B_{\pi}^a$  value in the northern mid-latitudes, including Tomsk, in 2015 (Fig. 1) due to the meridional aerosol transport.

Extensive forest (bush) fires could be another cause of occasional increases of the annual average  $B_{\pi}^a$  value. Combustion products (gases and aerosol particles) can reach the stratospheric altitudes via convective ascent within pyro-cumulonimbus (pyroCb) clouds (see, e.g., Fromm et al., 2006). For example, the smoke plumes from the strong bush fire, occurred near the Australian city of Melbourne on 7 February 2009, were observed in the local stratosphere at an altitude of  $\sim 18$  km (Siddaway and Petelina, 2011). In recent years, the number and intensity of massive forest fires have significantly increased (e.g., in the USA; Trickl et al., 2013) due to the climate change. The smoke-filled air masses frequently enter the stratosphere over the



South of Western Siberia from North America, where extensive forest fires occur. Their smoke plumes are most likely to be detected as the SAL perturbations over Tomsk. However, more detailed information about the pyroCb events is required for their correct identification. Thus, both the Kelut plume and smoke plumes from massive forest fires in the USA and Canada, with equal probability, could be the cause of the increase of  $B_{\pi}^a$  value in the stratosphere over Tomsk during the first quarter of 2015.

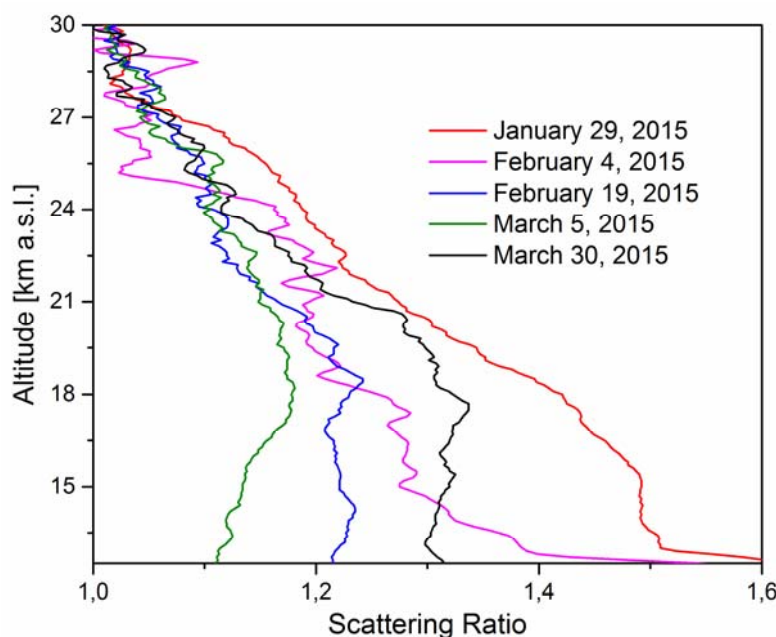

**Figure 15.** Perturbed scattering ratio profiles retrieved from the SLS aerosol lidar measurements between 29 January and 30 March, 2015.

#### 4 Discussion and conclusion

Thirty years (1986–2015) of lidar monitoring of the SAL state over Tomsk definitely showed that explosive eruptions with  
 10 VEI  $\geq 3$  of both tropical and extratropical (northern) volcanoes represent the main cause of the northern mid-latitude SAL perturbations. Moreover, the tropical volcanoes, rather than the northern ones, have a dominant role in volcanogenic aerosol loading of the mid-latitude stratosphere. Indeed, major explosive eruptions of tropical volcanoes are able to enrich the stratospheric tropical reservoir with volcanogenic aerosol. Additional aerosol loading of the tropical reservoir always leads to an increase in the annual average  $B_{\pi}^a$  value in the Northern Hemisphere mid-latitude stratosphere via the meridional  
 15 transport in the cold seasons (October to March). For example, plumes from both Merapi and Kelut volcanoes additionally supplied the stratospheric tropical reservoir with volcanic aerosol and gases (Table 1). As a result, the increased annual average  $B_{\pi}^a$  values (i.e. the SAL perturbations) were detected over Tomsk in 2011 and 2015, respectively (see Sects. 3.3.1 and 3.5). On the other hand, by contrast to tropical volcanoes, the northern ones represent point sources of volcanic gas,



aerosol, and ash plumes. Their corresponding air-mass trajectories can either pass over a lidar station or pass it by. Owing to this, a certain part of northern volcanoes eruptions into the stratosphere did not perturb the SAL over Tomsk and, therefore, was not detected there. It is clear that an extensive network of lidar stations in the territory of the Russian Federation is required to obtain objective data on the mid-latitude stratospheric aerosol loading.

- 5 In cases of the Eyjafjallajökull and probably Okmok and Kasatochi eruptions, the HYSPLIT air-mass backward trajectories, started from the altitudes of aerosol layers detected over Tomsk with the SLS aerosol lidar, passed over these volcanoes at altitudes  $H_{\text{traj}}^{\text{back.}}$  higher than their official MPAs (Sects. 3.2.1 and 3.2.3). On the other hand, the initial value  $H_{\text{MPA}}$  for the Kelut volcano eruption was determined as about 17 km, but the measurements, made by the CALIOP space-
- borne lidar onboard the CALIPSO satellite, clearly revealed that the rapidly rising portion of the Kelut plume reached an
- 10 altitude of ~26 km that is 9 km higher than  $H_{\text{MPA}}$  (GVP, 2014; Sect. 3.5). Based on these facts, we can offer the following explanation of the inconsistencies between the altitudes  $H_{\text{traj}}^{\text{back.}}$  and  $H_{\text{MPA}}$ . During Plinian explosive eruptions, solid and liquid ejecta, ash, and gas-vapor emissions intermix with each other, heat, and ascend inside the “convective thrust region” of an eruption column. Then the heated air together with erupted materials is known to expand, cool, and form the “umbrella region” of the eruption column (Woods, 1988; Scase, 2009). The most heated fraction of gas-vapor emissions from the
- 15 “convective thrust region” has the high thermal speed and, therefore, can penetrate through the lower-density “umbrella region” of the eruption column and reach altitudes higher than  $H_{\text{MPA}}$  (Raible et al., 2016). The secondary atmospheric  $\text{H}_2\text{SO}_4$  aerosols are formed via oxidation of  $\text{SO}_2$  contained in volcanic gas-vapor emissions. The currently available visual and radar methods for determining volcanic plume altitudes can detect only the large-sized volcanic ash particles. At the same time, these methods are not sensitive to the small-sized atmospheric  $\text{H}_2\text{SO}_4$  aerosols. Nevertheless, the submicron
- 20  $\text{H}_2\text{SO}_4$  aerosol particles can be easily detected by lidars.

In addition to volcanoes, PSCs also represent a cause of significant SAL perturbations and, hence, marked increases in the annual average  $B_{\pi}^a$  value. However, the temperature condition required for PSC formation (air temperature should be  $< -78$  °C) rarely holds in the mid-latitude stratosphere. The possibility of PSCs to form and be detected in the mid-latitudes is usually related with the presence of “mini ozone holes” drifting over lidar measurement points. As the lifetime of these

25 “holes” is sufficiently short in the mid-latitudes, the PSC observations can be only occasional. Only two PSC events in January 1995 and January 2007 were observed over Tomsk during the 30-year period of lidar observations in Tomsk.

Smoke plumes from strong forest (bush) fires can reach the stratospheric altitudes (Fromm et al., 2006; Siddaway and Petelina, 2011), spread out to great distances, and perturb the SAL state over different regions, including Tomsk. This is known to result in a measurable increase in the annual average  $B_{\pi}^a$  value. Due to the climate warming, the number and

30 intensity of massive forest fires have significantly increased in the last few years (Wotton et al., 2010). For example, about 137 strong forest fires were registered in the Northwest Territories of Canada in July 2014 (CBC News, 2014), and the Happy Camp Complex fire ( $41.80^\circ$  N,  $123.37^\circ$  W) eventually consumed more than 134 acres ( $543$  km<sup>2</sup>) of forests in





California in August–October 2014. According to the California Department of Forestry and Fire Protection (CAL FIRE, <http://www.ca.gov/>) data, the Happy Camp Complex fire is in the list of the “Top 20 Largest California Wildfires”. The smoke plumes from these mentioned massive forest fires could probably cause the increase in  $B_{\pi}^a$  value in the stratosphere over Tomsk in January–March 2015. More detailed information about the pyroCb events such as precise time, place, and smoke plume altitude is required to correctly assign the pyroCb plumes to the corresponding aerosol layers over an observation point via the HYSPLIT model trajectory analysis. It is quite possible that some after-effects of strong forest fires occurred, e.g., in North America could be detected over Tomsk, but not identified during lidar observations in Tomsk (1986–2015).

### Acknowledgements

- 10 We thank V. N. Marichev and A. V. El'nikov for their arrangements for continuous monitoring of the stratospheric aerosol layer parameters over Tomsk and development of the stratospheric aerosol remote sensing methods. This work was performed with financial support from the Russian Science Foundation (Grant # 14-27.00022).

### References

- Barnes, J. E. and Hofmann, D. J.: Lidar measurements of stratospheric aerosol over Mauna Loa Observatory, *Geophys. Res. Lett.*, 24, 1923–1926, doi:10.1029/97GL01943, 1997.
- 15 Barnes, J. E. and Hofmann, D. J.: Variability in the stratospheric background aerosol over Mauna Loa Observatory, *Geophys. Res. Lett.*, 28, 2895–2898, doi:10.1029/2001GL013127, 2001.
- Bösenberg, J., Matthias, V., Amodeo, A., Amoiridis, V., Ansmann, A., Baldasano, J. M., Balin, I., Balis, D., Böckmann, C., Boselli, A., Carlsson, G., Chaikovski, A., Chourdakis, G., Comerón, A., De Tomasi, F., Eixmann, R., Freudenthaler, V., Giehl, H., Grigorov, I., Hågård, A., Iarlore, M., Kirsche, A., Kolarov, G., Komguem, L., Kreipl, S., Kumpf, W., Larchevêque, G., Linné, H., Matthey, R., Mattis, I., Mekler, A., Mironova, I., Mitev, V., Mona, L., Müller, D., Music, S., Nickovic, S., Pandolfi, M., Papayannis, A., Pappalardo, G., Pelon, J., Pérez, C., Perrone, R. M., Persson, R., Resendes, D. P., Rizi, V., Rocadenbosch, F., Rodrigues, J. A., Sauvage, L., Schneidenbach, L., Schumacher, R., Sherbakov, V., Simeonov, V., Sobolewski, P., Spinelli, N., Stachlewska, I., Stoyanov, D., Trickl, T., Tsaknakis, G., Vaughan, G., Wandinger, U., Wang, X., Wiegner, M., Zavrtnik, M., and Zerefos, C.: EARLINET: A European Aerosol Research Lidar Network to Establish an Aerosol Climatology, Report No. 348, Max-Planck-Institut für Meteorologie, Hamburg, Germany, 191 pp., 2003.
- 20 Bourassa, A. E., Robock, A., Randel, W. J., Deshler, T., Rieger, L. A., Lloyd, N. D., Llewellyn, E. J., and Degenstein, D. A.: Large volcanic aerosol load in the stratosphere linked to Asian monsoon transport, *Science*, 337, 78–81, doi:10.1126/science.1219371, 2012.
- 30



- CBC News: Smoke from N.W.T. fires reaches Saskatchewan, Manitoba, available at: <http://www.cbc.ca/news/canada/north/smoke-from-n-w-t-fires-reaches-saskatchewan-manitoba-1.2701051> (last access: 15 March 2016), 2014.
- Chaykovskii, A. P., Ivanov, A. P., Balin, Yu. S., El'nikov, A. V., Tulinov, G. F., Plusnin, I. I., Bukin, O. A., and Chen, B. B.:  
5 CIS-LiNet lidar network for monitoring aerosol and ozone: methodology and instrumentation, *Atmos. Ocean. Opt.*,  
18, 958–964, 2005.
- Crutzen, P. J.: Albedo enhancement by stratospheric sulfur injections: A contribution to resolve a policy dilemma?, *Clim. Change*, 77, 211–219, doi:10.1007/s10584-006-9101-y, 2006.
- Driscoll, S., Bozzo, A., Gray, L. J., Robock, A., and Stenchikov, G.: Coupled Model Intercomparison Project 5 (CMIP5)  
10 simulations of climate following volcanic eruptions, *J. Geophys. Res.*, 117, D17105, doi:10.1029/2012JD017607,  
2012.
- El'nikov, A. V., Krekov, G. M., and Marichev, V. N.: Lidar observations of stratospheric aerosol layer above the western  
Siberia, *Izv. Acad. Sci. USSR, Atmos. Oceanic Phys.*, 24, 818–823, 1988.
- El'nikov, A. V., Zuev, V. V., Marichev, V. N., and Tsaregorodtsev, S. I.: First results of lidar observations of stratospheric  
15 ozone above Western Siberia, *Atmos. Opt.*, 2, 841–842, 1989.
- Fierstein, J. and Hildreth, W.: The plinian eruptions of 1912 at Novarupta, Katmai National Park, Alaska, *Bull. Volcanol.*,  
54, 646–684, doi:10.1007/BF00430778, 1992.
- Finlayson-Pitts, B. J. and Pitts, J. N.: *Chemistry of the Upper and Lower Atmosphere: Theory, Experiments, and Applications*, Academic Press, California, 969 pp., 2000.
- 20 Fromm, M., Tupper, A., Rosenfeld, D., Servranckx, R., and McRae, R.: Violent pyro-convective storm devastates  
Australia's capital and pollutes the stratosphere, *Geophys. Res. Lett.*, 33, L05815, doi:10.1029/2005GL025161, 2006.
- GVP: Global Volcanism Program, Smithsonian National Museum of Natural History: Sarychev Peak Bulletin Reports,  
available at: [http://volcano.si.edu/volcano.cfm?vn=290240#bgvn\\_200906](http://volcano.si.edu/volcano.cfm?vn=290240#bgvn_200906) (last access: 15 March 2016), 2009.
- GVP: Global Volcanism Program, Smithsonian National Museum of Natural History: Eyjafjallajökull Bulletin Reports,  
25 available at: [http://volcano.si.edu/volcano.cfm?vn=372020#bgvn\\_201004](http://volcano.si.edu/volcano.cfm?vn=372020#bgvn_201004) (last access: 15 March 2016), 2010.
- GVP: Global Volcanism Program, Smithsonian National Museum of Natural History: Kelut Bulletin Reports, available at:  
[http://volcano.si.edu/volcano.cfm?vn=263280#bgvn\\_201402](http://volcano.si.edu/volcano.cfm?vn=263280#bgvn_201402) (last access: 15 March 2016), 2014.
- Hofmann, D. J. and Solomon, S.: Ozone destruction through heterogeneous chemistry following the eruption of El Chichon,  
*J. Geophys. Res.*, 94, 5029–5041, doi:10.1029/JD094iD04p05029, 1989.
- 30 Kravitz, B. and Robock, A.: The climate effects of high latitude eruptions: Role of the time of year, *J. Geophys. Res.*, 116,  
D01105, doi:10.1029/2010JD014448, 2011.
- Laakso, A., Kokkola, H., Partanen, A.-I., Niemeier, U., Timmreck, C., Lehtinen, K. E. J., Hakkarainen, H., and Korhonen,  
H.: Radiative and climate impacts of a large volcanic eruption during stratospheric sulfur geoengineering, *Atmos. Chem. Phys.*, 16, 305–323, doi:10.5194/acp-16-305-2016, 2016.

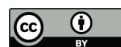

- Measures, R. M.: Laser Remote Sensing: Fundamentals and Applications, Wiley, New York, 510 pp., 1984.
- Murayama, T., Sugimoto, N., Matsui, I., Lio, Zh., Sakai, T., Shibata, T., Iwasaka, Y., Won, J. G., Yoon, S.C., Li, T., Zhou, J., and Hu, H.: Lidar Network observation of Asian dust, in: Advances in Laser Remote sensing: Selected papers 20-th Int. Laser Radar Conference (ILRC), Vichi, France, 10–14 July 2000, 169–177, 2000.
- 5 Newhall, C. G. and Self, S.: The Volcanic Explosivity Index (VEI): An estimate of explosive magnitude for historical volcanism, *J. Geophys. Res.*, 87, 1231–1238, doi:10.1029/JC087iC02p01231, 1982.
- Newman, P. A.: Chemistry and Dynamics of the Antarctic Ozone Hole, in: The Stratosphere: Dynamics, Transport, and Chemistry, Geophysical Monograph Series, 190, Polvani, L. M., Sobel, A. H., and Waugh, D. W. (Eds.), AGU, Washington, D.C., 157–171, doi:10.1002/9781118666630.ch9, 2010.
- 10 Prather, M.: Catastrophic loss of stratospheric ozone in dense volcanic clouds, *J. Geophys. Res.*, 97, 10187–10191, doi:10.1029/92JD00845, 1992.
- Raible, C. C., Brönnimann, S., Auchmann, R., Brohan, P., Frölicher, T. L., Graf, H.-F., Jones, P., Luterbacher, J., Muthers, S., Neukom, R., Robock, A., Self, S., Sudrajat, A., Timmreck, C., and Wegmann, M.: Tambora 1815 as a test case for high impact volcanic eruptions: Earth system effects, *WIREs Climate Change*, 7, 569–589, doi:10.1002/wcc.407, 2016.
- 15 Randel, W. J., Wu, F., Russell, J. M., Waters, J. W., and Froidevaux, L.: Ozone and temperature changes in the stratosphere following the eruption of Mount Pinatubo, *J. Geophys. Res.*, 100, 16,753–16,764, doi:10.1029/95JD01001, 1995.
- Robock, A.: Volcanic eruptions and climate, *Rev. Geophys.*, 38, 191–219, 2000.
- Robock, A.: Climatic Impacts of Volcanic Eruptions, in: The Encyclopedia of Volcanoes, 2nd Edition, Sigurdsson, H., Houghton, B., McNutt, S., Rymer, H., and Stix, J. (Eds.), Academic Press, London, 1456 pp., 2015.
- 20 Robock, A. and Oppenheimer, C. (Eds.): Volcanism and the Earth's Atmosphere, Geophysical Monograph Series, 139, AGU, Washington, D.C., 360 pp., 2003.
- Robock, A., Marquardt, A., Kravitz, B., and Stenchikov, G.: Benefits, risks, and costs of stratospheric geoengineering, *Geophys. Res. Lett.*, 36, L19703, doi:10.1029/2009GL039209, 2009.
- 25 Sandhya, M., Sridharan, S., Indira Devi, M., Niranjana, K., and Jayaraman, A.: A case study of formation and maintenance of a lower stratospheric cirrus cloud over the tropics, *An. Geo Comm.*, 33, 599–608, doi:10.5194/angeocom-33-599-2015, 2015.
- Scase, M. M.: Evolution of volcanic eruption columns, *J. Geophys. Res.*, 114, F04003, doi:10.1029/2009JF001300, 2009.
- Schmale, J., Schneider, J., Jurkat, T., Voigt, C., Kalesse, H., Rautenhaus, M., Lichtenstern, M., Schlager, H., Ancellet, G., Arnold, F., Gerding, M., Mattis, I., Wendisch, M., and Borrmann, S.: Aerosol layers from the 2008 eruptions of Mount Okmok and Mount Kasatochi: In situ upper troposphere and lower stratosphere measurements of sulfate and organics over Europe, *J. Geophys. Res.*, 115, D00L07, doi:10.1029/2009JD013628, 2010.
- 30 Siddaway, J. M. and Petelina, S. V.: Transport and evolution of the 2009 Australian Black Saturday bushfire smoke in the lower stratosphere observed by OSIRIS on Odin, *J. Geophys. Res.*, 116, D06203, doi:10.1029/2010JD015162, 2011.



- Siebert, L., Simkin, T., and Kimberly, P.: *Volcanoes of the World*, 3rd Edition, University of California Press, Berkeley, 551 pp., 2010.
- Solomon, S.: Stratospheric ozone depletion: A review of concepts and history, *Rev. Geophys.*, 37, 275–316, doi:10.1029/1999RG900008, 1999.
- 5 Stein, A. F., Draxler, R. R., Rolph, G. D., Stunder, B. J. B., Cohen, M. D., and Ngan, F.: NOAA's HYSPLIT atmospheric transport and dispersion modeling system, *Bull. Amer. Meteor. Soc.*, 96, 2059–2077, doi:10.1175/BAMS-D-14-00110.1, 2015.
- Stenchikov, G., Robock, A., Ramaswamy, V., Schwarzkopf, M. D., Hamilton, K., and Ramachandran, S.: Arctic Oscillation response to the 1991 Mount Pinatubo eruption: Effects of volcanic aerosols and ozone depletion, *J. Geophys. Res.*, 107, ACL 28-1–ACL 28-16, doi:10.1029/2002JD002090, 2002.
- 10 Timmreck, C.: Modeling the climatic effects of large explosive volcanic eruptions, *WIREs Clim. Change*, 3, 545–564, doi:10.1002/wcc.192, 2012.
- Trickl, T., Giehl, H., Jäger, H., and Vogelmann, H.: 35 yr of stratospheric aerosol measurements at Garmisch-Partenkirchen: from Fuego to Eyjafjallajökull, and beyond, *Atmos. Chem. Phys.*, 13, 5205–5225, doi:10.5194/acp-13-5205-2013, 2013.
- 15 Woods, A. W.: The fluid dynamics and thermodynamics of eruption columns, *Bull. Volcanol.*, 50, 169–193, doi:10.1007/BF01079681, 1988.
- Woods, D. C. and Osborn, M. T.: Twenty-six years of lidar monitoring of northern midlatitude stratospheric aerosols, *Proc. SPIE*, 4168, 249–255, doi: 10.1117/12.413871, 2001.
- 20 Wotton, B. M., Nock, C. A., and Flannigan M. D.: Forest fire occurrence and climate change in Canada, *Int. J. Wildland Fire*, 19, 253–271, doi:10.1071/WF09002, 2010.
- WWW: Wyoming Weather Web, University of Wyoming, College of Engineering: Atmospheric Soundings: Novosibirsk and Kolpasevo Observations, available at: <http://weather.uwyo.edu/upperair/sounding.html> (last access: 15 March 2016), 2007.
- 25 Zuev, V. E.: *Laser Beams in the Atmosphere*, Springer US, New York, 516 pp., 1982.
- Zuev, V. V.: Siberian Lidar Station – the unique experimental complex for remote investigations of the ozonosphere, *Atmos. Ocean. Opt.*, 13, 84–88, 2000.
- Zuev, V. V. and Smirnov, S. V.: Combined observations of the anomalies in the stratospheric ozone with the Siberian Lidar Station (SLS, 56.5° N, 85° E), *Atmos. Ocean. Opt.*, 10, 874–884, 1997.
- 30 Zuev, V. V., Zueva, N. E., Savelieva, E. S., Bazhenov, O. E., and Nevzorov, A. V.: On the role of the eruption of the Merapi volcano in an anomalous total ozone decrease over Tomsk in April 2011, *Atmos. Ocean. Opt.*, 29, 298–303, 2016.
- Zuev, V. V., Burlakov, V. D., and El'nikov, A. V.: Ten years (1986–1995) of lidar observations of temporal and vertical structure of stratospheric aerosols over Siberia, *J. Aerosol Sci.*, 29, 1179–1187, doi:10.1016/S0021-8502(98)00025-1, 1998.



- Zuev, V. V., Burlakov, V. D., El'nikov, A. V., Ivanov, A. P., Chaikovskii, A. P., and Shcherbakov, V. N.: Processes of long-term relaxation of stratospheric aerosol layer in Northern Hemisphere midlatitudes after a powerful volcanic eruption, *Atmos. Environ.*, 35, 5059–5066, doi:10.1016/S1352-2310(01)00327-2, 2001.
- 5 Zuev, V. V., Bazhenov, O. E., Burlakov, V. D., Grishaev, M. V., Dolgii, S. I., and Nevzorov, A. V.: On the effect of volcanic aerosol on variations of stratospheric ozone and NO<sub>2</sub> according to measurements at the Siberian Lidar Station, *Atmos. Ocean. Opt.*, 21, 825–831, 2008.
- Zuev, V. V., Balin, Yu. S., Bukin, O. A., Burlakov, V. D., Dolgii, S. I., Kabashnikov, V. P., Nevzorov, A. V., Osipenko, F. P., Pavlov, A. N., Penner, I. E., Samoilova, S. V., Stolyarchuk, S. Yu., Chaikovskii, A. P., and Shmirko, K. A.: Results of joint observations of aerosol perturbations of the stratosphere at the CIS-LiNet network in 2008, *Atmos. Ocean. Opt.*, 22, 10 295–301, 2009.
